# Supplementary material for: Ternary and Quaternary Nanocrystalline Cu-Based Sulfides as Perspective Antibacterial Materials Mechanochemically Synthesized in a Scalable Fashion
Source: PubMed Central journal article supplement — ACS Omega. 2022 Jul 26;7(31):27164–71. doi: 10.1021/acsomega.2c01657 (PMC9366776; doi:10.1021/acsomega.2c01657), 2022-07-26
Supplement: ao2c01657_si_001.pdf [file ao2c01657_si_001.pdf]

## **Electronic Supplementary Information**

for the paper

### **Ternary and quaternary nanocrystalline Cu-based sulfides as perspective antibacterial materials mechanochemically synthesized in a scalable fashion**

Matej Baláž<sup>1</sup>, Ľudmila Tkáčiková<sup>2</sup>, Martin Stahorský<sup>1</sup>, Mariano Casas Luna<sup>3</sup>, Erika Dutková<sup>1</sup>, Ladislav Čelko<sup>3</sup>, Mária Kováčová<sup>1</sup>, Marcela Achimovičová<sup>1</sup>, Peter Baláž<sup>1</sup>

<sup>1</sup>Institute of Geotechnics, Slovak Academy of Sciences, Košice, Slovakia

<sup>2</sup>Department of Microbiology and Immunology, University of Veterinary Medicine and Pharmacy, Košice, Slovakia

<sup>3</sup>Central European Institute of Technology, Brno University of Technology, Brno, Czech Republic

**Table S1: Main phases present in the mechanochemically synthesized ternary and quaternary Cu-based sulfides, references to the crystallographic information and to the corresponding publications. The principal phase is marked in bold.**

| Sample  | Principal phase / Possible secondary phases                     | Crystallographic identification card | Reference                     |
|---------|-----------------------------------------------------------------|--------------------------------------|-------------------------------|
| KOCH 1  | <b>CuFeS<sub>2</sub></b>                                        | ICSD: 28894                          | chalcopyrite<br>not available |
|         | CuS                                                             | ICOD: 11281                          |                               |
|         | FeS <sub>2</sub>                                                | ICSD: 56533                          |                               |
| KOCH 2  | <b>Cu<sub>6</sub>Fe<sub>2</sub>SnS<sub>8</sub></b>              | ICSD: 40047                          | 1                             |
|         | Cu <sub>5</sub> FeS <sub>4</sub>                                | ICSD: 1963                           |                               |
|         | Cu <sub>4</sub> SnS <sub>4</sub>                                | ICSD: 000833                         |                               |
| KOCH 3  | <b>Cu<sub>6</sub>FeSn<sub>2</sub>S<sub>8</sub></b>              | ICOD: 35-0683                        | chatkalite<br>not available   |
|         | Cu <sub>2</sub> FeSnS <sub>4</sub>                              | ICSD: 26721                          |                               |
| KOCH 4  | <b>Cu<sub>8</sub>Fe<sub>3</sub>Sn<sub>2</sub>S<sub>12</sub></b> | ICOD: 351352                         | stannoidite<br>not available  |
|         | SnS                                                             | ICSD: 651008                         |                               |
| KOCH 5  | <b>Cu<sub>2</sub>FeSn<sub>3</sub>S<sub>8</sub></b>              | ICSD: 008215                         | 2                             |
|         | Cu <sub>6</sub> Sn <sub>5</sub>                                 | ICSD: 158249                         |                               |
|         | SnS                                                             | ICSD: 651008                         |                               |
| KOCH 6  | <b>Cu<sub>2</sub>ZnSnS<sub>4</sub></b>                          | ICSD: 628893                         | 3                             |
|         | ZnS                                                             | ICSD: 107167                         |                               |
| KOCH 7  | <b>Cu<sub>12</sub>Sb<sub>4</sub>S<sub>13</sub></b>              | ICSD: 41753                          | 4                             |
|         | Cu <sub>3</sub> SbS <sub>4</sub>                                | ICSD: 002857                         |                               |
|         | Cu <sub>3</sub> SbS <sub>3</sub>                                | ICSD: 74901                          |                               |
| KOCH 8  | <b>Cu<sub>13</sub>VSn<sub>3</sub>S<sub>16</sub></b>             | ICOD: 411410                         | 5                             |
|         | CuS                                                             | ICOD: 11281                          |                               |
|         | Cu <sub>2</sub> SnS <sub>3</sub>                                | ICSD: 91762                          |                               |
| KOCH 9  | <b>Cu<sub>2</sub>SnS<sub>3</sub></b>                            | ICSD: 043532                         | 6                             |
|         | SnS                                                             | ICSD: 106028                         |                               |
|         | S <sub>9</sub>                                                  | ICSD: 404231                         |                               |
| KOCH 10 | <b>Cu<sub>3</sub>SbS<sub>4</sub></b>                            | ICSD: 64721                          | 7                             |
|         | S <sub>8</sub>                                                  | ICSD: 412326                         |                               |
| KOCH 11 | <b>Cu<sub>3</sub>SbS<sub>3</sub></b>                            | ICSD: 74901                          | skinnerite<br>not available   |
|         | Cu <sub>3</sub> SbS <sub>3</sub>                                | ICSD: 031113                         |                               |
| KOCH 12 | <b>Cu<sub>2</sub>FeSnS<sub>4</sub></b>                          | ICOD: 35582                          | stannite<br>not available     |
|         | S                                                               | ICSD: 016470                         |                               |
|         | Cu <sub>2</sub> FeSn <sub>3</sub> S <sub>8</sub>                | ICSD: 008215                         |                               |
|         | Cu <sub>2</sub> S                                               | ICOD: 21272                          |                               |

Figure S1: Representative images from testing of antibacterial activity using the agar well diffusion method: (a) samples KOCH 1-6 against *S. aureus*, (b) samples KOCH 7-12 against *S. aureus*, (c) samples KOCH 1-6 against *E. coli*, (d) samples KOCH 7-12 against *E. coli*

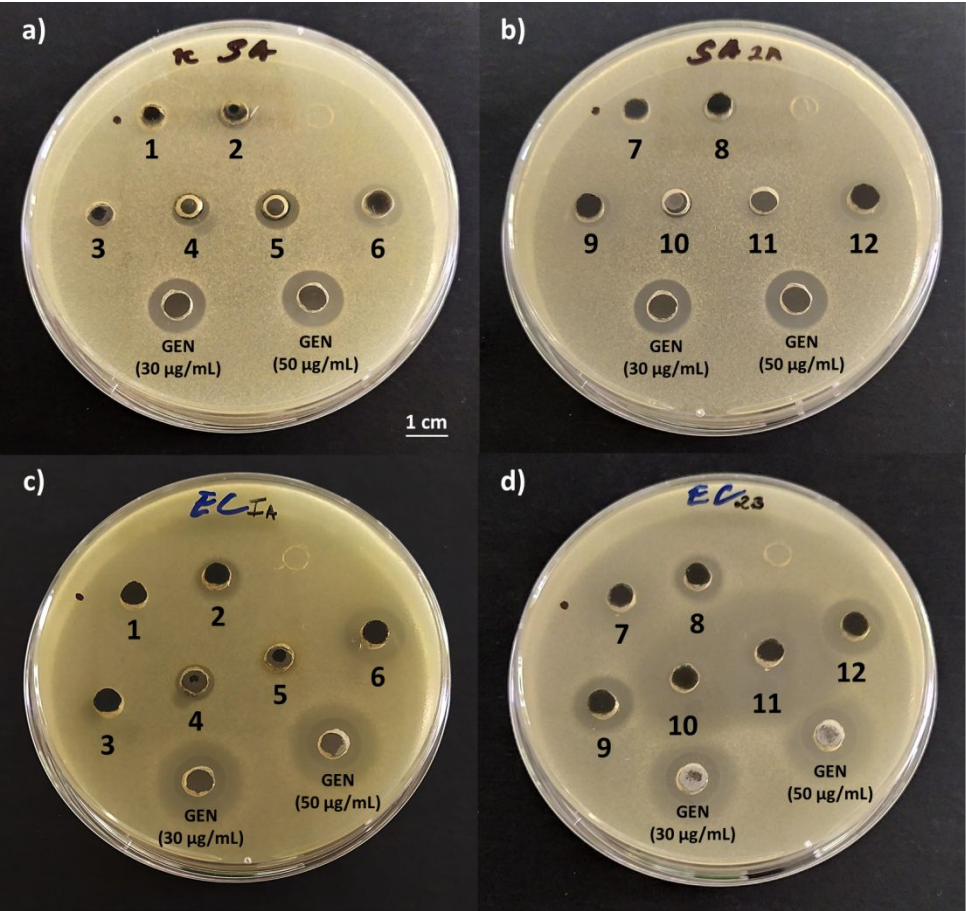

**Table S2: Zeta potential values for all 12 KOCH samples under study**

| <b>Sample</b> | <b>Main phase</b>                                               | <b>Zeta potential (mV)</b> |
|---------------|-----------------------------------------------------------------|----------------------------|
| KOCH 1        | <b>CuFeS<sub>2</sub></b>                                        | 15.3                       |
| KOCH 2        | <b>Cu<sub>6</sub>Fe<sub>2</sub>SnS<sub>8</sub></b>              | 8.3                        |
| KOCH 3        | <b>Cu<sub>6</sub>FeSn<sub>2</sub>S<sub>8</sub></b>              | 15.0                       |
| KOCH 4        | <b>Cu<sub>8</sub>Fe<sub>3</sub>Sn<sub>2</sub>S<sub>12</sub></b> | 5.2                        |
| KOCH 5        | <b>Cu<sub>2</sub>FeSn<sub>3</sub>S<sub>8</sub></b>              | 5.3                        |
| KOCH 6        | <b>Cu<sub>2</sub>ZnSnS<sub>4</sub></b>                          | 7.9                        |
| KOCH 7        | <b>Cu<sub>12</sub>Sb<sub>4</sub>S<sub>13</sub></b>              | -12.8                      |
| KOCH 8        | <b>Cu<sub>13</sub>VSn<sub>3</sub>S<sub>16</sub></b>             | -3.3                       |
| KOCH 9        | <b>Cu<sub>2</sub>SnS<sub>3</sub></b>                            | 7.6                        |
| KOCH 10       | <b>Cu<sub>3</sub>SbS<sub>4</sub></b>                            | -18.7                      |
| KOCH 11       | <b>Cu<sub>3</sub>SbS<sub>3</sub></b>                            | -32.9                      |
| KOCH 12       | <b>Cu<sub>2</sub>FeSnS<sub>4</sub></b>                          | 4.3                        |
